# Supplementary material for: One-pot synthesis of 3-D dandelion-like architectures constructed by rutile TiO2 nanorods grown along [001] axis for high-rate lithium ion batteries
Source: Royal Society of Chemistry journal article supplement (doi:10.1039/c5ra00006h), 2015-01-01
Supplement: c5ra00006h1.pdf [file c5ra00006h1.pdf]

*Electronic Supplementary Information for*

**One-pot synthesis of 3-D dandelions-like architectures constructed by rutile TiO<sub>2</sub> nanorods grown along [001] axis for high-rate lithium ion batteries**

**Yu Bai,<sup>a</sup> Naiqing Zhang,<sup>\*,a,b</sup> and Kening Sun<sup>\*,a,b</sup>**

<sup>a</sup> Academy of Fundamental and Interdisciplinary Sciences, Harbin Institute of Technology, Harbin, 150001, China.

<sup>b</sup> State Key Laboratory of Urban Water Resource and Environment, Harbin Institute of Technology, Harbin, 150090, PR China.

---

\* To whom correspondence should be addressed. E-mail: [keningsunhit@126.com](mailto:keningsunhit@126.com); [znqmww@126.com](mailto:znqmww@126.com);

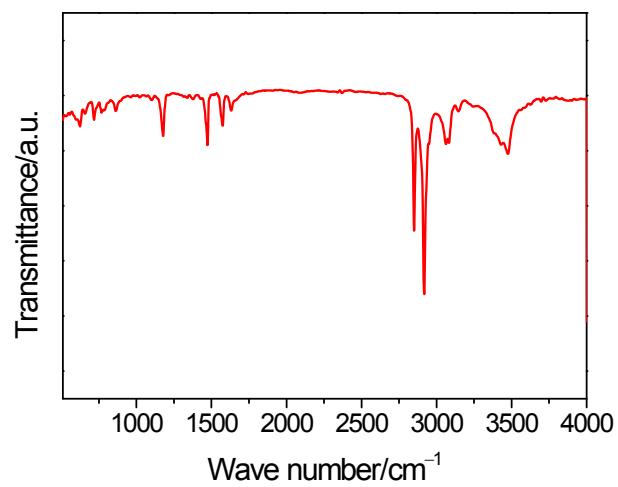

**Fig. S1** FT-IR spectrum of C16mimBr.

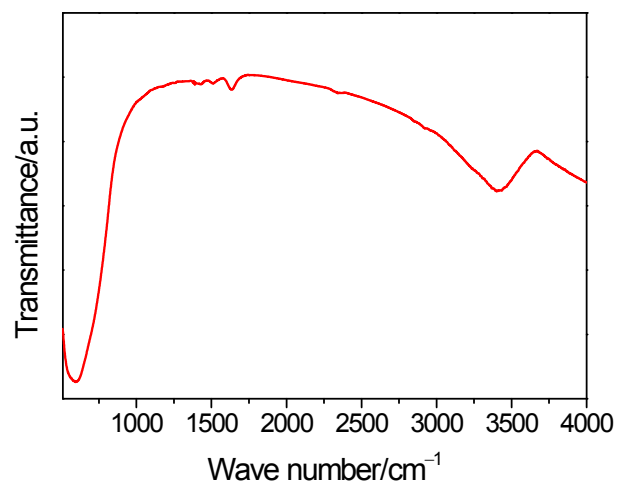

**Fig. S2** FT-IR spectrum of the TiO<sub>2</sub> rutile.

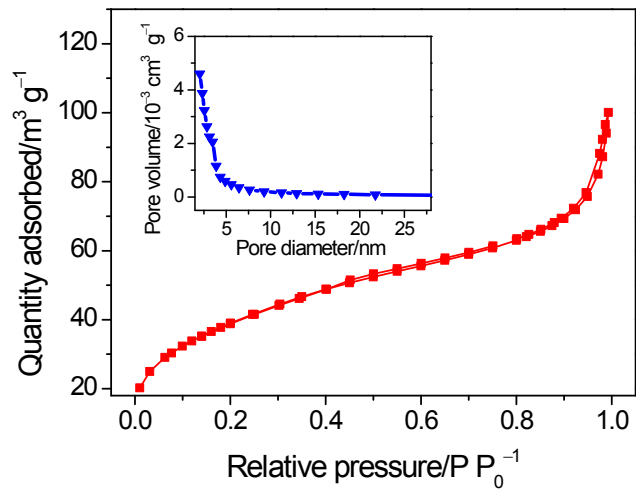

**Fig. S3** N<sub>2</sub> adsorption/desorption isotherms for the TiO<sub>2</sub> rutile (the inset shows the BJH data).

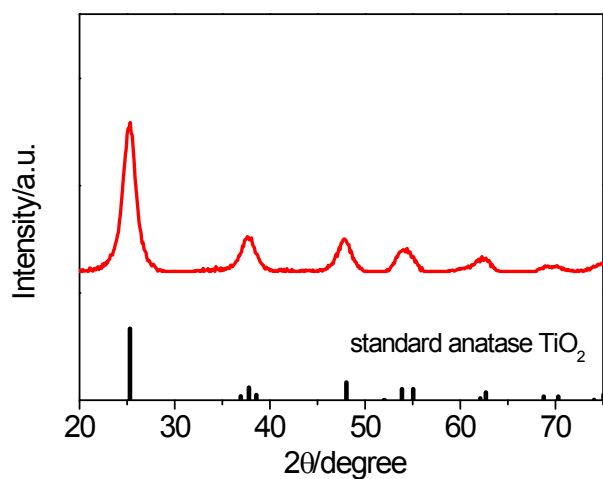

**Fig. S4** XRD of standard anatase  $\text{TiO}_2$  (JCPDS. No. 65-5714) and the as-derived  $\text{TiO}_2$  without C16mimBr in the synthesizing procedure.

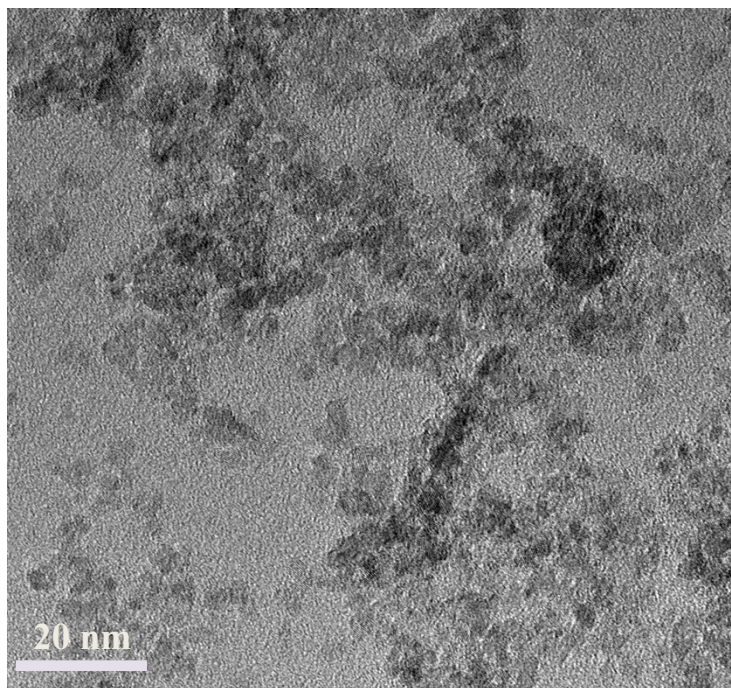

**Fig. S5** TEM image of the as-derived anatase TiO<sub>2</sub> without C16mimBr in the synthesizing procedure.

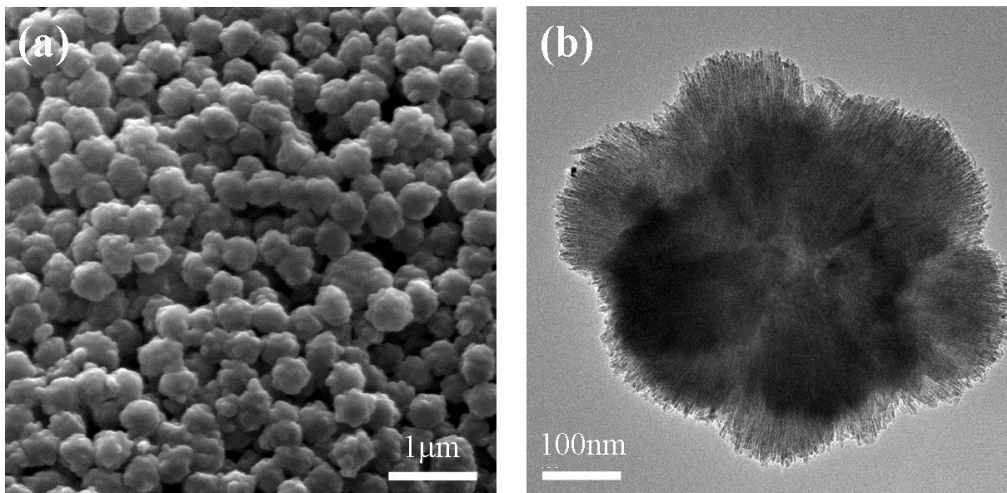

**Fig. S6.** (a) Representative SEM image of rutile  $\text{TiO}_2$  after the cycling process.  
(b) TEM image of a  $\text{TiO}_2$  particle after the cycling process
